# Supplementary material for: Sushi domain-containing protein 4 binds to epithelial growth factor receptor and initiates autophagy in an EGFR phosphorylation independent manner
Source: PubMed Central journal article supplement (PMC9798675; doi:10.1186/s13046-022-02565-1), 2022-12-29
Supplement: 13046_2022_2565_MOESM1_ESM.pdf [file 13046_2022_2565_MOESM1_ESM.pdf]

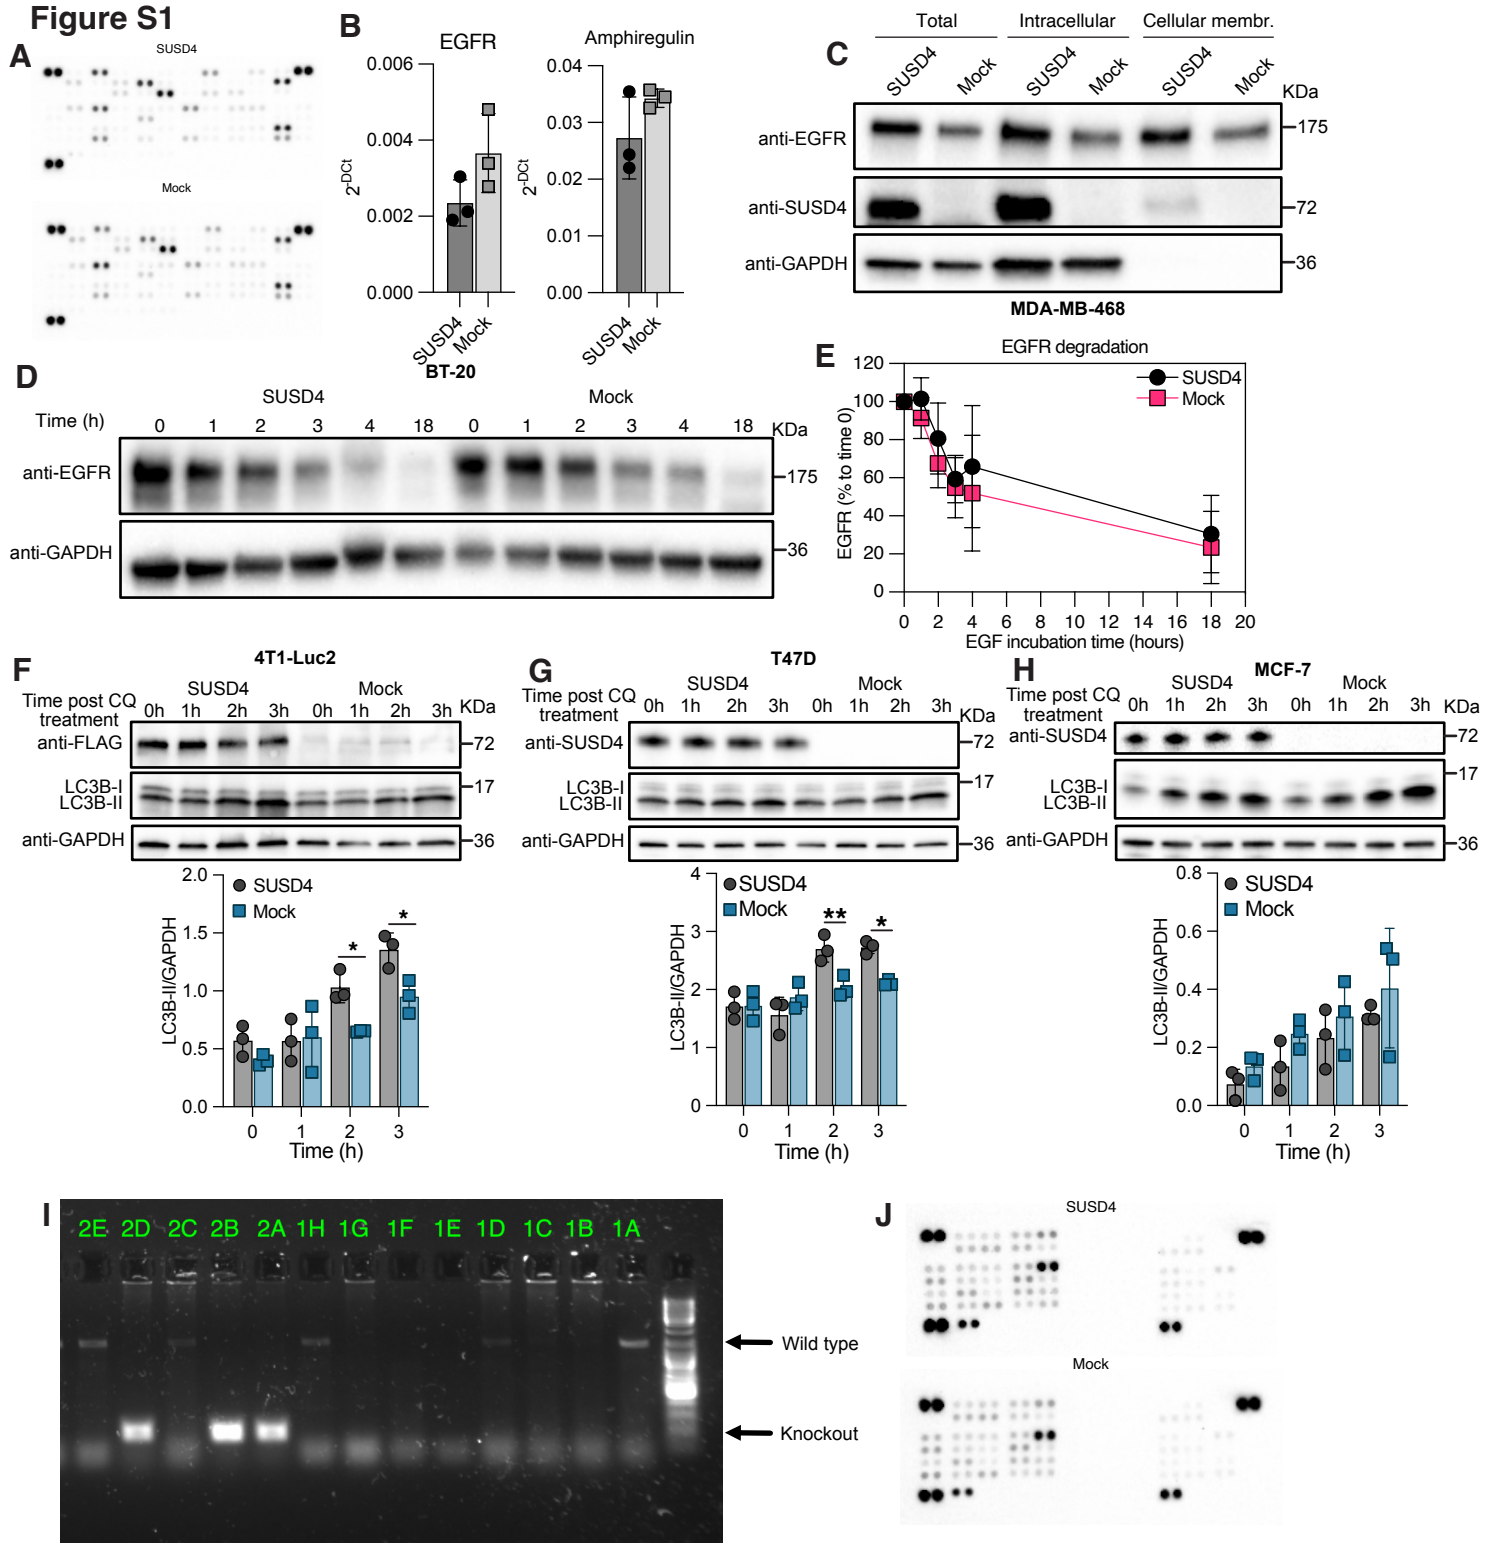

**Fig. S1.** Effect of SUSD4 expression on signaling molecules. (A) Dot plots image of the Protein profile Human XL Oncology Array (B) Quantitative real-time PCR comparing the expression of EGFR and amphiregulin between BT-20 cells stably expressing SUSD4 and mock control cells. (C) Biotinylation of cell surface proteins in MDA-MB-468 cells stably expressing SUSD4 and mock control cells followed by immunoblot detection of SUSD4 and EGFR in the intracellular- and plasma membrane fractions. EGFR degradation in SUSD4-expressing BT-20 cells and mock control cells. Representative immunoblots (D) and densitometric analysis of EGFR levels relative to baseline (E) following serum starvation and treatment with EGF. Evaluation of LC3B-II levels under three hours of chloroquine treatment for 4T1Luc2 (F), T47D (G), and MCF-7 (H) cells stable expressing SUSD4 compared with the control mock cells. (I) A representative image of agarose gel with PCR products of amplified fragment of the exon 8 to exon 10 of EGFR after CRISPR/Cas9 genome editing of the BT-20 breast cancer cell line. (J) Dot plots image of the Human Phospho-Kinase Antibody Array. All results were repeated in at least three independent biological experiments. The p-value was estimated with t test when two groups were compared and with Two-way ANOVA test when two or more groups were compared for two independent parameters, \* $p < 0.05$ , \*\* $p < 0.01$ , \*\*\* $p < 0.001$  and \*\*\*\* $p < 0.0001$ .

**Figure S2**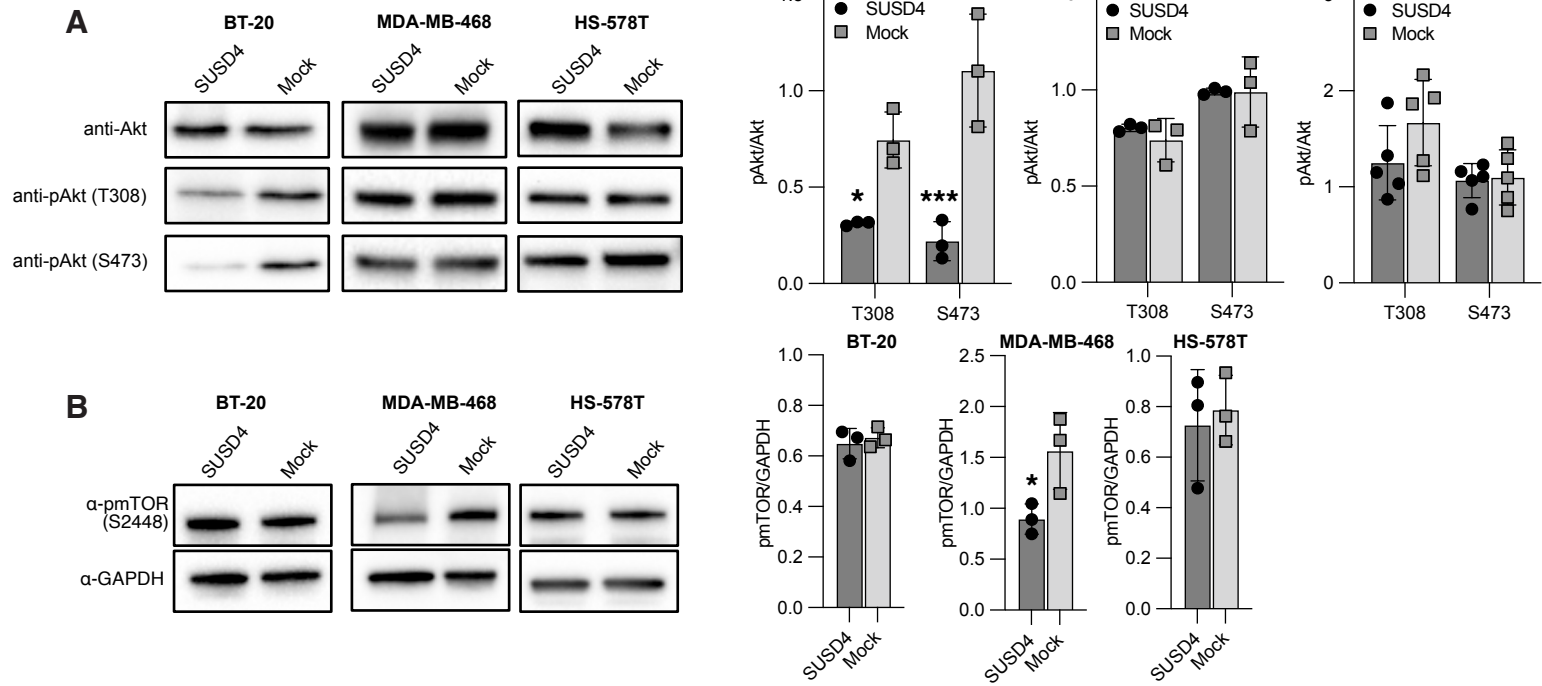

**Fig. S2.** (A) Representative immunoblots and densitometric analysis showing the ratio of phosphorylated Akt to total Akt in BT-20 cells, MDA-MB-468 cells and HS-578T cells stably expressing SUSD4 and the corresponding mock control cells. Two distinct phosphorylation sites were assessed (Tyr308 and Ser473) for BT-20, MDA-MB-468 and HS-578T cells. (B) Representative immunoblots and densitometric analysis of phospho-mTOR (Ser2448) levels in SUSD4-expressing BT-20-, MDA-MB-468-, and HS-578T cells and the corresponding mock control cells. All results were repeated in at least three independent biological experiments. The p-value was estimated with Two-way ANOVA test \* $p \leq 0.05$ , \*\* $p \leq 0.01$ , \*\*\* $p \leq 0.001$  and \*\*\*\* $p \leq 0.0001$ .

**Figure S3**

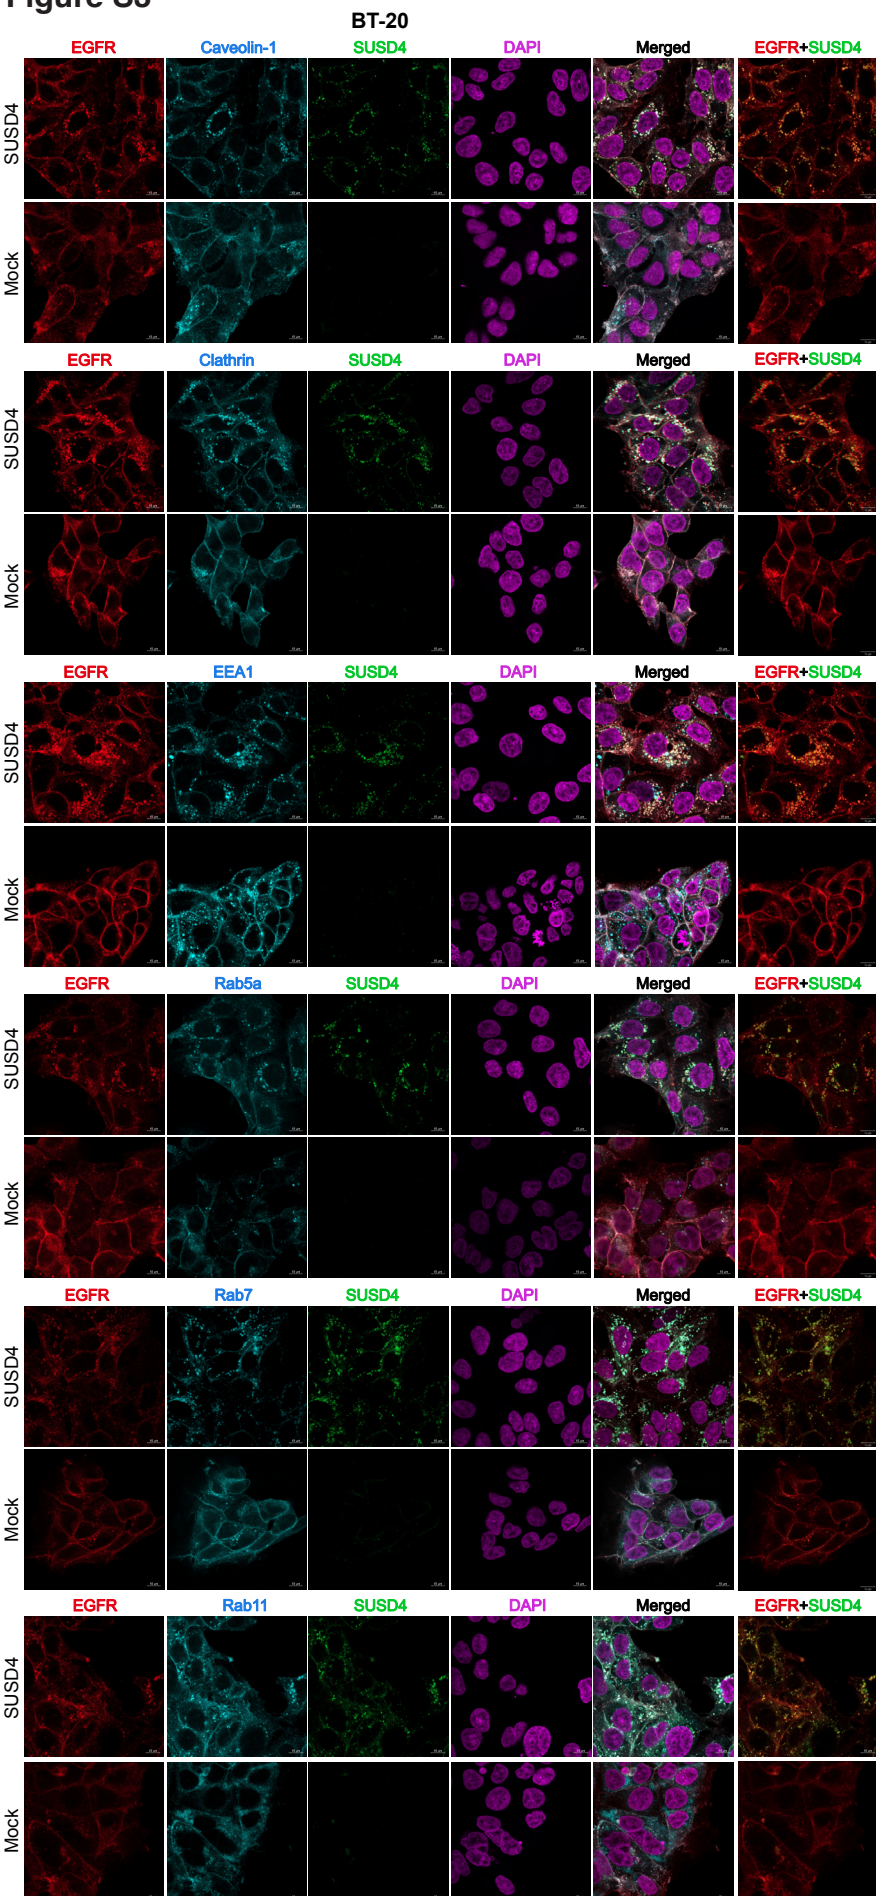

**Fig. S3. Colocalization of SUSD4 and EGFR with endo-/lysosomal markers.** Representative single-channel and merged confocal images co-stained for EGFR (red), SUSD4 (green), endo-/lysosomal markers (orange) and DAPI (blue) in SUSD4-expressing BT-20 and corresponding mock control cells. All results were repeated in at least three independent biological experiments

**Figure S4**

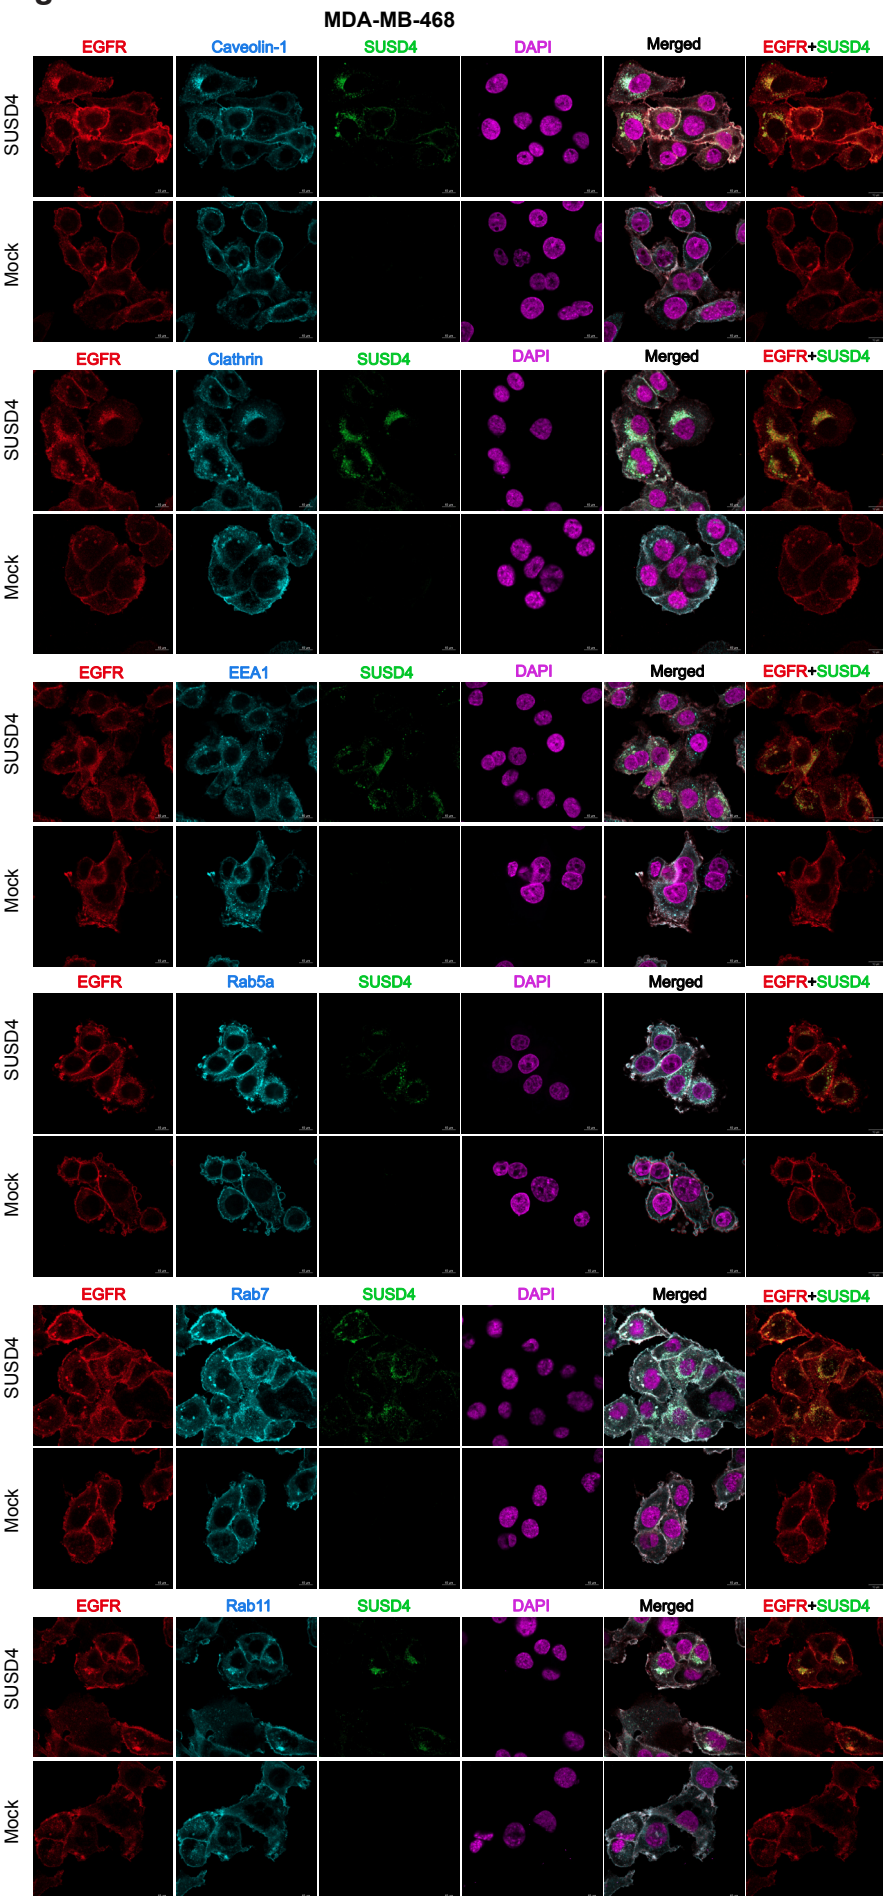

**Fig. S4. Colocalization of SUSD4 and EGFR with endo-/lysosomal markers.** Representative single-channel and merged confocal images co-stained for EGFR (red), SUSD4 (green), endo-/lysosomal markers (orange) and DAPI (blue) in SUSD4-expressing MDA-MB-468 cells and corresponding mock control cells. All results were repeated in at least three independent biological experiments

**Figure S5**

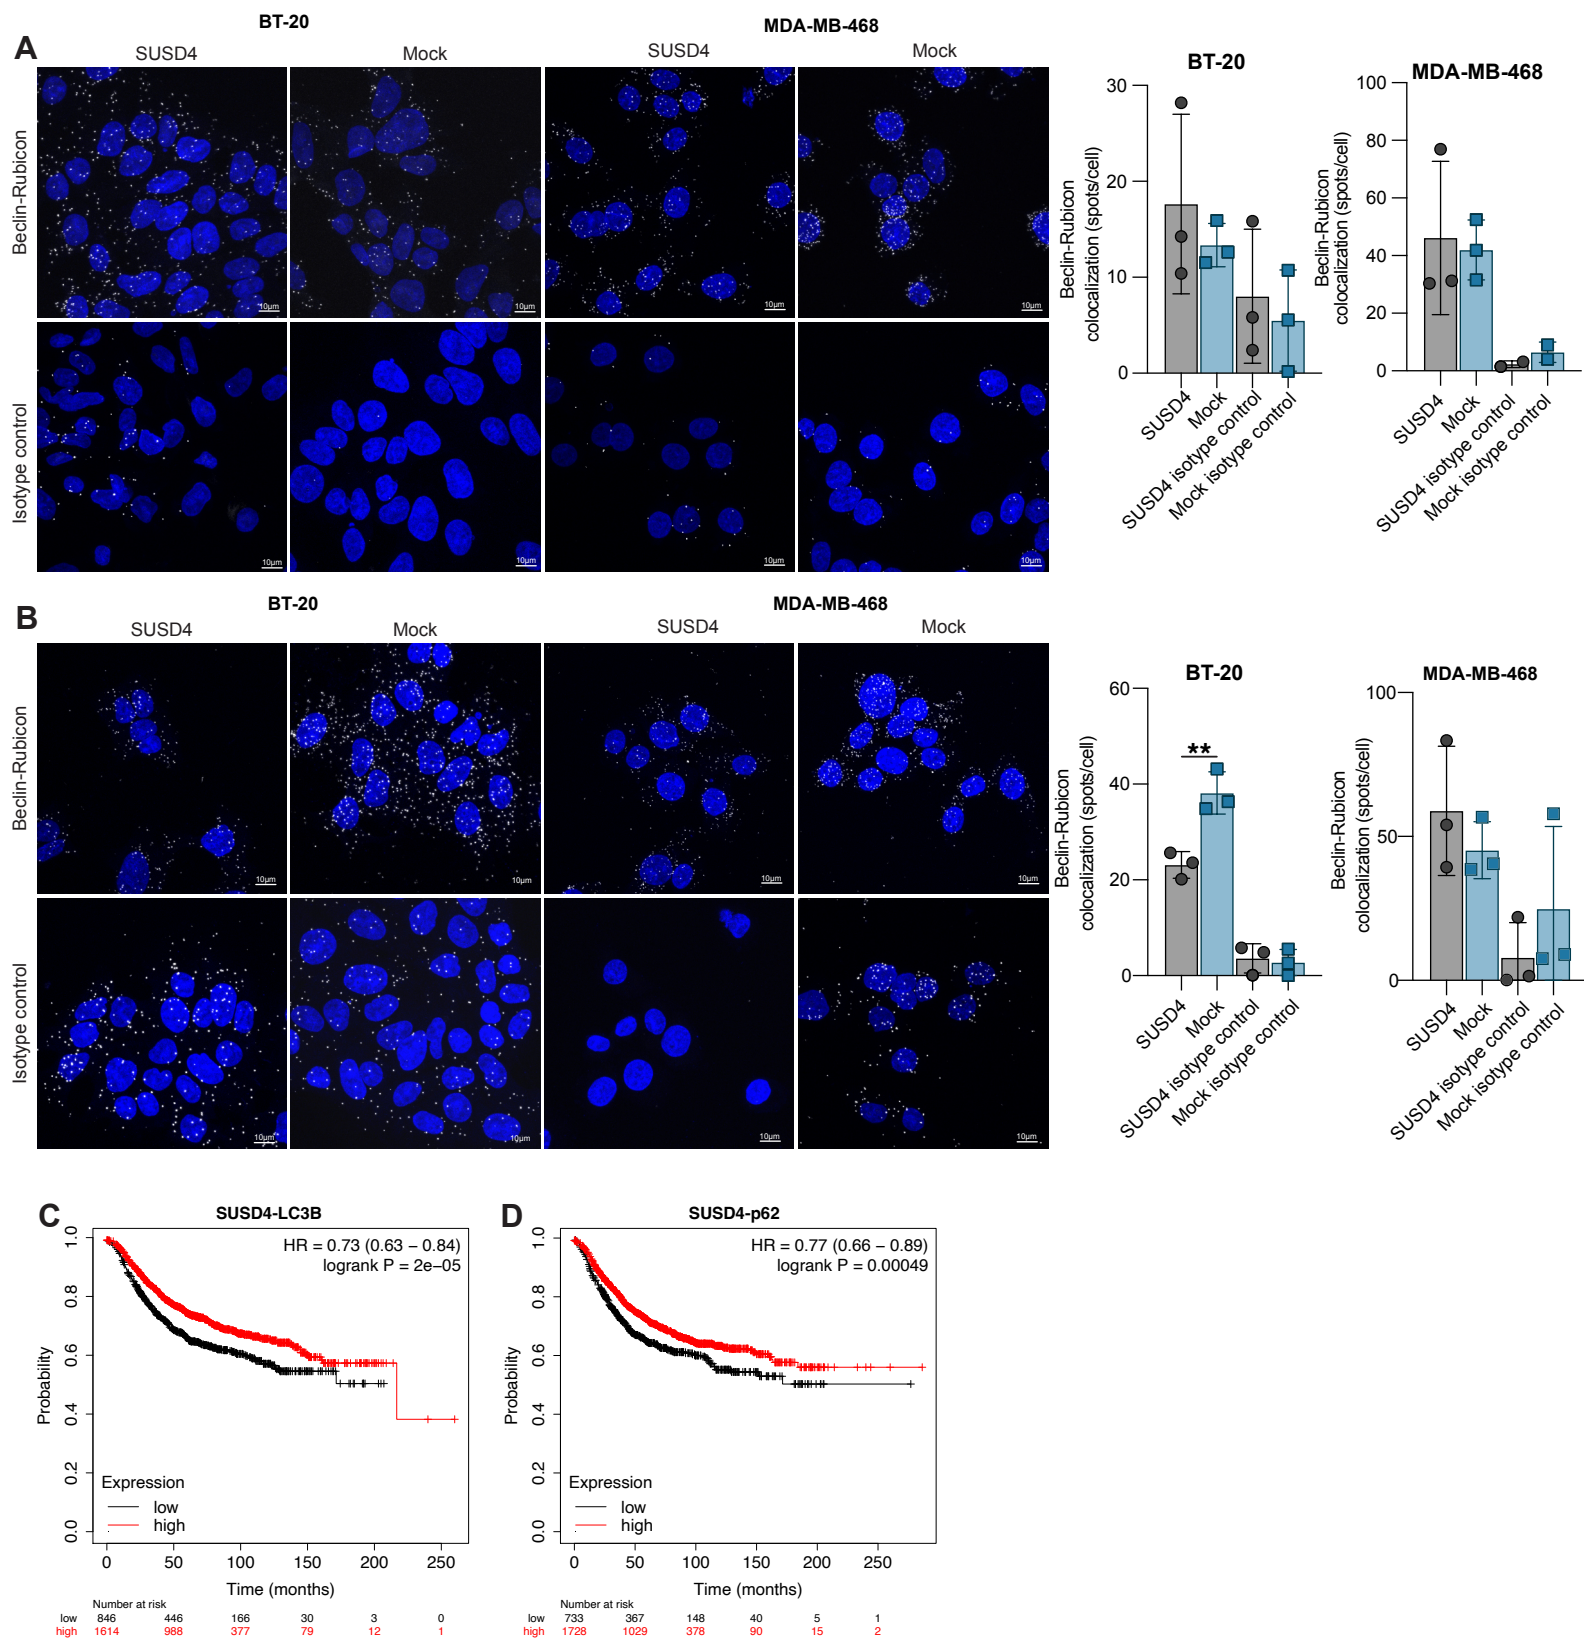

**Fig. S5. Assessment of colocalization between Rubicon and Beclin-1.** (A) Representative confocal images from a proximity ligation assay and quantified colocalization (white spots) of Rubicon and Beclin-1 in SUSD4-expressing BT-20 cells or MDA-MB-468 cells and corresponding mock control cells. (B) Same as (A) but cells were serum-starved prior to fixation for the proximity ligation assay. Kaplan Meier survival analysis showing relapse free survival for breast cancer patients with high or low levels of SUSD4 expression and positive for the expression of autophagy markers LC3B (C) and p62 (D). All results were repeated in at least three independent biological experiments. The p-value was estimated with t test when two groups were compared \*p<0.05, \*\*p<0.01, \*\*\*p<0.001 and \*\*\*\*p<0.0001

**Table S1. Plasmids constructed and used in this study.**

| Plasmid name               | Backbone | Insert                          | Resistance            |
|----------------------------|----------|---------------------------------|-----------------------|
| pCDNA3+SUSD4               | pCDNA3   | cDNA human SUSD4                | Ampicillin, G418      |
| pCDNA3+mSUSD4              | pCDNA3   | cDNA mouse SUSD4                | Ampicillin, G418      |
| pCDNA3+SUSD4 $\Delta$ CCP1 | pCDNA3   | cDNA human SUSD4 (del. 169-357) | Ampicillin, G418      |
| pCDNA3+SUSD4 $\Delta$ CCP2 | pCDNA3   | cDNA human SUSD4 (del. 361-537) | Ampicillin, G418      |
| pCDNA3+SUSD4 $\Delta$ CCP3 | pCDNA3   | cDNA human SUSD4 (del.538-717)  | Ampicillin, G418      |
| pCDNA3+SUSD4 $\Delta$ CCP4 | pCDNA3   | cDNA human SUSD4 (del. 718-912) | Ampicillin, G418      |
| pCDNA3+SUSD4LSPF           | pCDNA3   | cDNA human SUSD4 Y379F          | Ampicillin, G418      |
| pCDNA3+SUSD4PPAF           | pCDNA3   | cDNA human SUSD4 Y414F          | Ampicillin, G418      |
| PX459+sgRNAEGFREx8F        | PX459    | GTGTGTAACGGAATAGGTAT            | Ampicillin, Puromycin |
| PX459+sgRNAEGFREx10F       | PX459    | ACCTAGAAATCATACGCGGC            | Ampicillin, Puromycin |
| EGFR-KD                    | pEGFP-N1 | cDNA human EGFR-EGFP K721A      | Kanamycin             |

**Table S2. Primers used in this study.**

| Name           | Sequence (5'-3')                                               | Description  |
|----------------|----------------------------------------------------------------|--------------|
| $\Delta$ CCP1F | TCACGGGCGGGTTCGATGACCTTGATTGCCGTATCCCTCAAATCGAAGATG            | del. 169-357 |
| $\Delta$ CCP2F | AGTGATAATTCCATCTGTGTGCAAGAATGCCTGAGACCTCTAGCCTCT               | del. 361-537 |
| $\Delta$ CCP3F | TGGAATAATCTGCCCATCTGTCAAGGCCTGGAAGTCTGTCCACTACCTCCAATG         | del.538-717  |
| $\Delta$ CCP4F | GCCCACCCCGGTGCCTTGCTTCAGAGCAAACGTGGCCAGCA                      | del.538-717  |
| LSPYmutF       | GACGGCGTGCCCGTCATGCTCCCGTCCCTTGACGAAGCTGTGAGTGCGCGGCTTGAGTG    | SUSD4 Y379F  |
| PPAYmutF       | GGACGACCAGAGCCCCCAGCATTCCCGGCTCAGGGGACACGGACACAG               | SUSD4 Y414F  |
| EGFR-KDF       | GGGTGAGAAAGTTAAAAATCCCGTCGCTATCGCGGAATTAAGAGAAGCAACATCTCCGAAAG | EGFP K721A   |
| EGFR Exon8F    | TCCAACAAATGTGAACGGAATA                                         | EGFRKO-PCR   |
| EGFR Exon10R   | TGCCCTATCTTAGCAACTCTCC                                         | EGFRKO-PCR   |

**Table S3. List of antibodies**

| Target                            | Subtype               | Supplier    | Catalogue number |
|-----------------------------------|-----------------------|-------------|------------------|
| SUSD4                             | Polyclonal Rabbit IgG | Homemade    | -                |
| EGFR                              | Polyclonal Goat IgG   | R&D systems | AF231            |
| Phospho-EGFR (Tyr1045)            | Polyclonal Rabbit IgG | CST         | 2237             |
| Phospho-EGFR (Tyr1086)            | Monoclonal Rabbit IgG | R&D systems | MAB8967          |
| GAPDH                             | Mouse monoclonal IgG1 | Abcam       | ab8245           |
| Phospho-Akt (Ser473)              | Monoclonal Rabbit IgG | CST         | 4060             |
| Phospho-Akt (Thr308)              | Monoclonal Rabbit IgG | CST         | 13038            |
| Akt                               | Monoclonal Rabbit IgG | CST         | 4691             |
| Mouse IgG HRP                     | Polyclonal Goat IgG   | Dako        | P0447            |
| Rabbit IgG HRP                    | Polyclonal Goat IgG   | Dako        | P0448            |
| Rabbit IgG HRP                    | Polyclonal Goat IgG   | CST         | 7074             |
| AMPK $\alpha$ 1                   | Monoclonal Rabbit IgG | CST         | 5831             |
| Phospho- AMPK $\alpha$ 1 (Thr172) | Monoclonal Rabbit IgG | CST         | 2535             |
| Phospho-ULK1 (Ser757)             | Polyclonal Rabbit IgG | CST         | 6888             |
| mTOR                              | Monoclonal Rabbit IgG | CST         | 2983             |
| Phospho-mTOR (Ser2448)            | Monoclonal Rabbit IgG | CST         | 5536             |
| PDGFR $\alpha$                    | Monoclonal Mouse IgG1 | R&D systems | MAB322           |
| LC3B                              | Polyclonal Rabbit IgG | Sigma       | L7543            |
| Anti-SQSTM1/p62                   | Mouse monoclonal      | Abcam       | ab56416          |
| ULK1                              | Monoclonal Rabbit IgG | CST         | 8054             |
| Phospho-ULK1 (Ser757)             | Polyclonal Rabbit IgG | CST         | 6888             |
| Phospho-ULK1 (Ser555)             | Monoclonal Rabbit IgG | CST         | 5869             |
| Phospho-ULK1 (Ser317)             | Polyclonal Rabbit IgG | CST         | 37762            |
| Beclin-1                          | Monoclonal mouse IgG1 | CST         | 4122             |
| phospho-Beclin-1 (Ser30)          | Monoclonal Rabbit IgG | CST         | 35955            |
| Atg14                             | Monoclonal Rabbit IgG | CST         | 96752            |
| Phospho-Atg14 (Ser29)             | Monoclonal Rabbit IgG | CST         | 92340            |
| LKB1                              | Monoclonal Rabbit IgG | CST         | 3047             |
| Phospho-LKB1 (Ser428)             | Monoclonal Rabbit IgG | CST         | 3482             |
| Caveolin-1                        | Monoclonal Rabbit IgG | CST         | 3267             |
| Clathrin Heavy Chain              | Monoclonal Rabbit IgG | CST         | 4796             |
| EEA1                              | Monoclonal Rabbit IgG | CST         | 3288             |
| Rab5A                             | Monoclonal mouse IgG1 | CST         | 46449            |
| Rab7                              | Monoclonal Rabbit IgG | CST         | 9367             |
| Rab11                             | Monoclonal Rabbit IgG | CST         | 5589             |
